# Supplementary material
Source: PubMed Central journal article supplement (PMC7791525)
Supplement: ajtr0012-8216-f2.pdf [file ajtr0012-8216-f2.pdf]

## Polymorphisms in microRNA genes and the ALL risk

**Table S1.** References used for selection of the investigated genes and polymorphisms

| GENE            | Variant ID | References |
|-----------------|------------|------------|
| <i>AGO1</i>     | rs636832   | [38-40]    |
| <i>DROSHA</i>   | rs10035440 | [20, 41]   |
|                 | rs3805500  | [19-21]    |
| <i>MIR219-1</i> | rs107822   | [42, 43]   |
|                 | rs213210   | [31, 43]   |
| <i>MIR146a</i>  | rs2910164  | [12, 44]   |
| <i>MIR300</i>   | rs12894467 | [45, 46]   |
| <i>MIR499a</i>  | rs3746444  | [12, 26]   |
| <i>MIR608</i>   | rs4919510  | [47, 48]   |
| <i>MIR938</i>   | rs2505901  | [31, 34]   |

**Table S2.** Characterization of the polymorphisms analyzed in the present study and their quality control parameters

| GENE               | rs         | ALLELE | FUNCTION                           | QUALITY CONTROL |                 |         |          |
|--------------------|------------|--------|------------------------------------|-----------------|-----------------|---------|----------|
|                    |            |        |                                    | MAF             | Genotyping rate | HWE*    | Status   |
| <i>AGO1</i>        | rs636832   | A>G    | Intron variant                     | 36%             | 80%             | 0.33887 | Included |
| <i>DROSHA</i>      | rs10035440 | T>C    | Intron variant                     | 15%             | 81%             | 1.0000  | Included |
| <i>DROSHA</i>      | rs3805500  | G>A    | Intron variant                     | 49%             | 83%             | 0.20689 | Included |
| <i>MIR146a</i>     | rs2910164  | G>C    | Mature miRNA variant               | 29%             | 86%             | 0.12694 | Included |
| <i>MIR219-1</i>    | rs213210   | A>G    | Regulatory region variant          | 17%             | 89%             | 0.02196 | Included |
| <i>MIR219-1</i>    | rs107822   | C>T    | TF binding site                    | 37%             | 80%             | 0.07143 | Included |
| <i>MIR300</i>      | rs12894467 | T>C    | Non-coding transcript exon variant | 39%             | 90%             | 0.00204 | Included |
| <i>MIR499a</i>     | rs3746444  | A>G    | Mature miRNA variant               | 18%             | 86%             | 0.11173 | Included |
| <i>MIR608</i>      | rs4919510  | G>C    | Mature miRNA variant               | 36%             | 86%             | 1.0000  | Included |
| <i>PRE-MIR-938</i> | rs2505901  | C>T    | Intron variant                     | 40%             | 81%             | 0.00859 | Included |

\*Significance adjusted for multiple comparisons by the Bonferroni correction ( $P \leq 0.001$ ).
